# Supplementary material for: The Role of Zn Substitution in Improving the Electrical Properties of CuI Thin Films and Optoelectronic Performance of CuI MSM Photodetectors
Source: MDPI journal article supplement (doi:10.3390/ma15228145), 2022-11-17

Supplementary data

# The Role of Zn Substitution in Improving the Electrical Properties of CuI Thin Films and Optoelectronic Performance of CuI MSM Photodetectors

Chien-Yie Tsay <sup>1,\*</sup>, Yun-Chi Chen <sup>1</sup>, Hsuan-Meng Tsai <sup>1</sup>, Phongsaphak Sittimart <sup>2</sup> and Tsuyoshi Yoshitake <sup>2</sup>

<sup>1</sup> Department of Materials Science and Engineering, Feng Chia University, Taichung 40724, Taiwan

<sup>2</sup> Department of Advanced Energy Science and Engineering, Kyushu University, Fukuoka 816-8580, Japan

\* Correspondence: cytsay@mail.fcu.edu.tw; Tel.: +886-4-2451-7250 (ext. 5312)

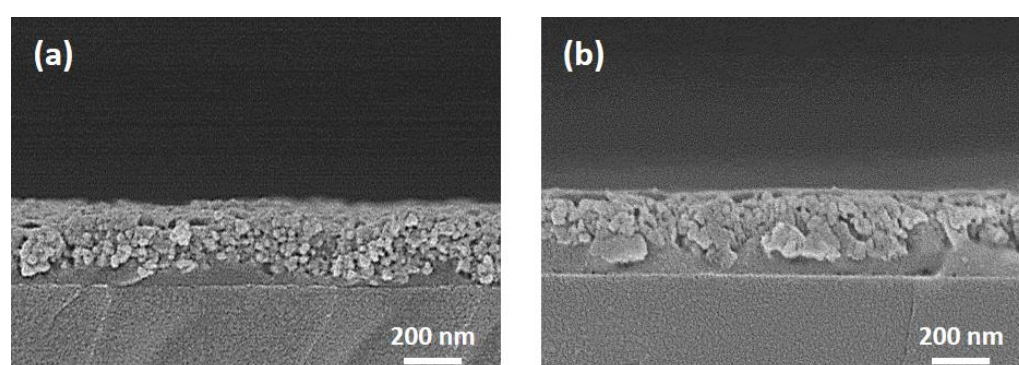

**Figure S1.** Cross-sectional view FE-SEM micrographs of the pure CuI (a) and 8 at% Zn (b) substituted CuI thin films on glass substrate.

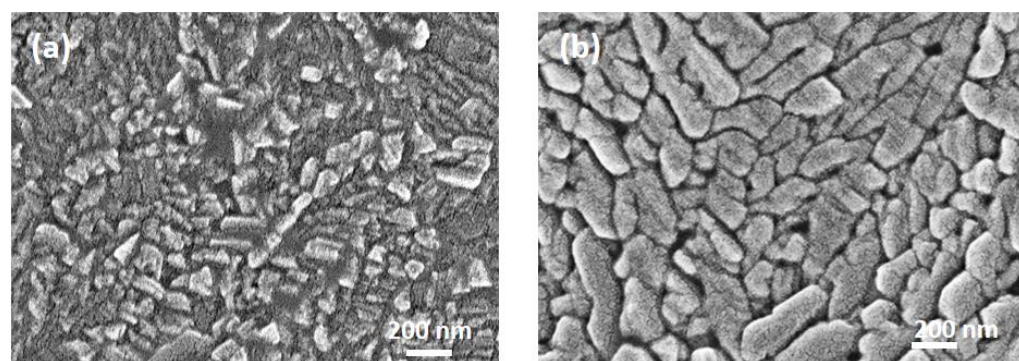

**Figure S2.** Plane-view FE-SEM micrographs of the pure CuI (a) and 8 at% Zn (b) substituted CuI thin films.

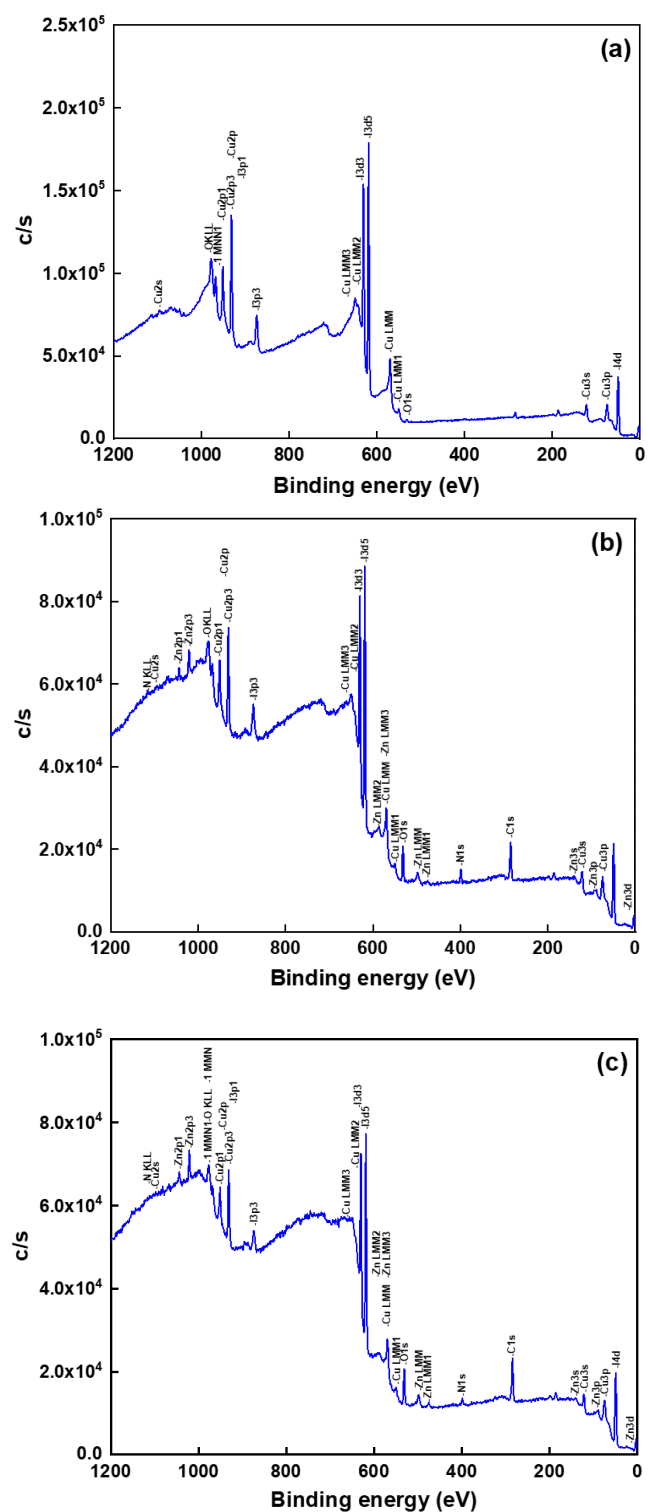

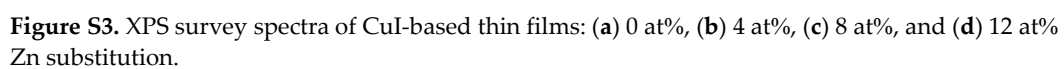

Supplement: s1 [file s1]
